# Supplementary material for: Comparative Seed Morphology of Tropical and Temperate Orchid Species with Different Growth Habits
Source: Plants (Basel). 2020 Jan 29;9(2):161. doi: 10.3390/plants9020161 (PMC7076704; doi:10.3390/plants9020161)
Supplement: Supplementary file 1 [file plants-09-00161-s001.pdf]

**Table S1.** Plant taxonomy, morphology, biogeographical origin and ecological habits of the orchid species used in this study.

| Species<br>(Common<br>Name)                                                | Sub Family/<br>Tribe/Genus/<br>Section                                             | Distribution                                                                                 | Habitat & Morphology                                                                                                                                                                                                                                                                                                                                                                                                                                                                                                                                                 | Flowering<br>Time/Flower<br>Duration/<br>Capsule<br>Maturity<br>Time | Flower                                                                                                      | Reference(s) |
|----------------------------------------------------------------------------|------------------------------------------------------------------------------------|----------------------------------------------------------------------------------------------|----------------------------------------------------------------------------------------------------------------------------------------------------------------------------------------------------------------------------------------------------------------------------------------------------------------------------------------------------------------------------------------------------------------------------------------------------------------------------------------------------------------------------------------------------------------------|----------------------------------------------------------------------|-------------------------------------------------------------------------------------------------------------|--------------|
| <i>Dendrobium<br/>strebloceras</i><br>(Twisted horn<br><i>Dendrobium</i> ) | Epidendroideae/<br>Dendrobiinae/<br><i>Dendrobium</i> /<br><i>Spatulata</i> Lindl. | Indonesia.<br>The Moluccas,<br>Halmahera<br>Island                                           | Habitat: tropical epiphytic, rain forests, low altitudes, warm conditions, high humidity, bright-filtered light<br>Morphology:<br>- Large-sized plant<br>- Pseudobulbs: up to 1.5 m long, 1.5 cm in diameter<br>- Leaves: fleshy, ovate-oblong to lanceolate along the upper half, up to 16 cm long, 5 cm wide<br>- Inflorescence: up to 40 cm long, 6–8 flowers, each up to 5 cm long, fragrant<br>- Petal and sepal: twisted, pale yellow or green suffused with brown to dark brown, darkens with age                                                             | Throughout<br>the year/up to<br>2 months/150<br>days                 | 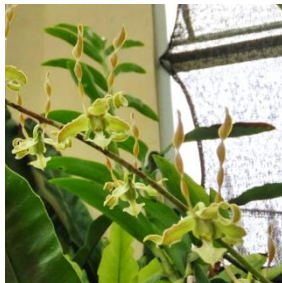<br>(Photo: Suskandari)  | [1]          |
| <i>Dendrobium<br/>lineale</i><br>(Morobe<br>shower<br>orchid)              | Epidendroideae/<br>Dendrobiinae/<br><i>Dendrobium</i> /<br><i>Spatulata</i> Lindl. | Indonesia.<br>Irian Jaya border<br>to Milne Bay<br>(North-eastern<br>coast of New<br>Guinea) | Habitat: Tropical epiphytic/lithophytic, rain forests, low altitudes (coastal or water streams at sea level to above 800 m), warm conditions, high humidity, direct sunlight<br>Morphology:<br>- Large-sized plant<br>- Pseudobulbs: up to 2 m long and 2-3 cm in diameter<br>- Leaves: fleshy, leathery oblong to lanceolate along the upper two-thirds of stem, 8–15 cm long<br>- Inflorescence: up to 75 cm long, arching, flowers up to 5 cm across<br>- Petal and sepal: white, pale yellow–purplish vein predominating lip, dark brown at edge of lower petals | Throughout<br>the year/<br>up to 2–3<br>months/<br>120 days          | 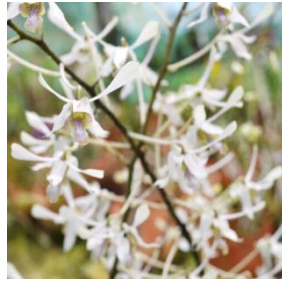<br>(Photo: Suskandari) | [1]          |

|                                                                                               |                                                                     |                                                                                                                                           |                                                                                                                                                                                                                                                                                                                                                                                                                                                                                                                                                                                                                                                                                                                                                                                           |                                                                                    |                                                                                      |                  |
|-----------------------------------------------------------------------------------------------|---------------------------------------------------------------------|-------------------------------------------------------------------------------------------------------------------------------------------|-------------------------------------------------------------------------------------------------------------------------------------------------------------------------------------------------------------------------------------------------------------------------------------------------------------------------------------------------------------------------------------------------------------------------------------------------------------------------------------------------------------------------------------------------------------------------------------------------------------------------------------------------------------------------------------------------------------------------------------------------------------------------------------------|------------------------------------------------------------------------------------|--------------------------------------------------------------------------------------|------------------|
| <p><i>Dendrobium cunninghamii</i><br/>(Christmas orchid, bamboo orchid, winika, pekapeka)</p> | <p>Epidendroideae/<br/>Dendrobiinae/<br/><i>Winika</i>/ -</p>       | <p>New Zealand (endemic).<br/>North and South Islands, the Chatham &amp; Stewart Island</p>                                               | <p>Habitat: Temperate epiphytic/lithophytic, moist rain forests, low altitudes below 500 m), intermediate-cool temperature, semi-shade<br/>Morphology:<br/>- Pseudobulbs: long, slender, yellowish canes up to 2 m long, branched, pendulous, clustering in large clump<br/>- Leaves: leaf sheath throughout stem, lateral, borne on the upper half of final branches of the stem, 2–3 cm long, 3–3.5 mm wide<br/>- Inflorescence: lateral, 3-6 flowers, each up to 2.5 cm across<br/>- Petal and sepal: white-yellow base with purple column wings, 4 yellow-green purple topped ribs in the mid-lamina, membranous segments, 3-lobed lip, broad labellum</p>                                                                                                                            | <p>December-January/ up to 10 days/ 1 month</p>                                    | 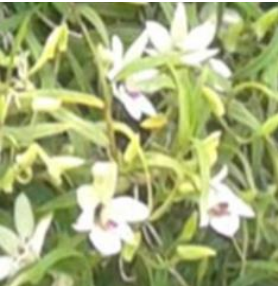  | <p>[1,2]</p>     |
| <p><i>Gastrodia cunninghamii</i><br/>(Potato orchid)</p>                                      | <p>Epidendroideae/<br/>Gastrodieae/<br/><i>Gastrodia</i>/ -</p>     | <p>New Zealand. East coast of North and South Island, Middle and lower part of South Island, the Chatham &amp; Stewart Island</p>         | <p>Habitat: temperate, terrestrial, saprophytic, lowland to montane forests, common in mature pine plantations<br/>Morphology:<br/>- Tall plant (up to 1 m height)<br/>- Tuber: Large and extensively branched<br/>- Leaves: no leaves, no chlorophyll, plant is brown, black or greenish with tiny scales on the stem as residual leaves<br/>- Inflorescence: up to 70 flowers per stem, knobbly and tubular flowers<br/>- Petal and sepal: petals and sepals are merged and separated only at their tips, labellum is attached at the inner base of the tube, only black tipped yellow end shows</p>                                                                                                                                                                                    | <p>November-February/ up to 2 months/ information not available</p>                | 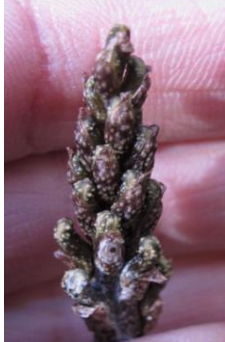  | <p>[1,2,3]</p>   |
| <p><i>Pterostylis banksii</i><br/>(Greenhood orchid)</p>                                      | <p>Orchidoideae/<br/>Pterostylidinae/<br/><i>Pterostylis</i>/ -</p> | <p>New Zealand. North and South Islands (except some part of east-coast and middle of South Island), the Chatham &amp; Stewart Island</p> | <p>Habitat: Temperate, terrestrial, lowland to montane and subalpine forests, scrub<br/>Morphology:<br/>- Tuber: ovoid, form dense colonies, plant height up to 50 cm (one of New Zealand's largest orchids)<br/>- Leaves: thin grass-like leaves, usually 4-6, up to 25 cm in length, long and smooth, internodes very short near the base, distributed up the stem<br/>- Petal and sepal: single flower, 3-5 cm high, green with translucent white stripes, tips of petals range in colour from white to orange-red, dorsal sepal very long, often slightly upturned at the tip. Petals much shorter than the dorsal sepal. Lateral sepals diverge at a narrow angle, tips very long, erect or swept backward. Labellum tip is flat or arched, top reddish. Stigma long and narrow.</p> | <p>October - December/ 1 month (<i>P. patens</i>)/ 2 months (<i>P. patens</i>)</p> | 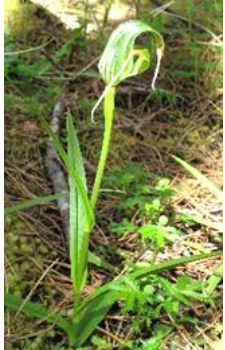 | <p>[1,2,3,4]</p> |

(Notes: Size, structure, and colouring can be quite variable)

(Photo: Paul Topp)

Surya Diantina)

(Photo:

(Photo: Surya Diantina)

|                                        |                                                      |                                                                                                                                                 |                                                                                                                                                                                                                                                                                                                                                                                                                                                                                                                                                                                                                                                     |                                                                               |                                                                                     |           |
|----------------------------------------|------------------------------------------------------|-------------------------------------------------------------------------------------------------------------------------------------------------|-----------------------------------------------------------------------------------------------------------------------------------------------------------------------------------------------------------------------------------------------------------------------------------------------------------------------------------------------------------------------------------------------------------------------------------------------------------------------------------------------------------------------------------------------------------------------------------------------------------------------------------------------------|-------------------------------------------------------------------------------|-------------------------------------------------------------------------------------|-----------|
| <i>Thelymitra nervosa</i> (Sun orchid) | Orchidoideae/<br>Diurideae/<br><i>Thelymitra</i> / - | New Zealand.<br>Several parts of central and lower North Island, upper part and few areas on the east coast of South Island, the Chatham Island | Habitat: Temperate, terrestrial, open areas, low vegetation often on clay, wet, peaty areas<br>Morphology:<br>- Tuber: ovoid (oval)<br>- Leaf: single, long, narrow and thin leaf, quite fleshy, channelled and keeled, sheathing the stem at its base<br>- Inflorescence: bright colour flower, blooms in warm sunny days, regular shape, short column, grows up to 30 cm, up to 6 flowers of 1.5 cm in diameter<br>- Petal and sepal: dark lavender-blue or pink, unstriped, petal spotted, column blue with thick erect white hairs on the horizontal arms, dark brown slightly hooded midlobe, warty with dark tubercles and yellow toothed rim | October - January/ 5 days ( <i>T. longifolia</i> )/ information not available | 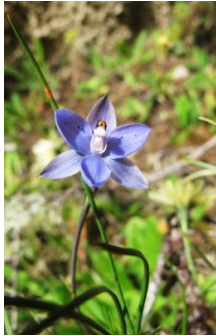 | [1,2,3,4] |
|----------------------------------------|------------------------------------------------------|-------------------------------------------------------------------------------------------------------------------------------------------------|-----------------------------------------------------------------------------------------------------------------------------------------------------------------------------------------------------------------------------------------------------------------------------------------------------------------------------------------------------------------------------------------------------------------------------------------------------------------------------------------------------------------------------------------------------------------------------------------------------------------------------------------------------|-------------------------------------------------------------------------------|-------------------------------------------------------------------------------------|-----------|

(Photo: Surya Diantina)

## References

1. Lavarack, P.S.; Harris, W.F.; Stocker, G. *Dendrobium and its relatives*. Timber Press: US; 2000.
2. New Zealand Native Orchid Group. *A pocket guide to the New Zealand native orchids*. The New Zealand Native Orchid Group Inc.: wellington, New Zealand; 2015.
3. George, st I. The natural guide to New Zealand orchids. Random House: Auckland, New Zealand, 1999; 176 p.
4. Lehnebach, C.; Robertson, A.W.; Hedderley, D. Pollination of four NZ terrestrial orchids. *N. Z. J. Bot.* **2005**, *43*, 467–477. doi:0028–825X/05/4302–0467.
